# Supplementary material for: Whole exome sequencing identified novel mutation in SUOX gene causes extremely rare autosomal recessive isolated sulfite oxidase deficiency
Source: Research Square preprint supplement (doi:10.21203/rs.3.rs-90427/v1), 2020-10-19
Supplement: Supplementary file 1 [file 8e3320a361f89bf7aa315800.docx]

**Table 4. TroPI, myocardial enzyme and AMON test of the patient.**

| Test name | Result | Unit | Reference Interval | Test method |
| --- | --- | --- | --- | --- |
| Creatine Kinase (CK) | 244↑ | U/L | 55-170 | dry chemistry method |
| Creatine kinase MB isoenzyme (CK-MB) | 10.9↑ | ng/ml | 0-2.37 | chemiluminescence |
| LDH | 464 | U/L | 313-618 | dry chemistry method |
| Troponin (TroPI) | 0.146↑ | ng/ml | 0-0.034 | chemiluminescence |
| Ammonia (AMON) | 133.6↑ | µmol/L | 9-33 | dry chemistry method |
| LAC | >24 PH | mmol/L | 0.7-2.1 | dry chemistry method |
